# Supplementary material for: Influence of Zn+2 Doping on Ni-Based Nanoferrites; (Ni1−x ZnxFe2O4)
Source: PubMed Central journal article supplement (PMC6669650; doi:10.3390/nano9071024), 2019-07-17
Supplement: nanomaterials-09-01024-s001.pdf [file nanomaterials-09-01024-s001.pdf]

# Influence of Zn<sup>+2</sup> Doping on Ni-Based Nanoferrites; (Ni<sub>1-x</sub>Zn<sub>x</sub>Fe<sub>2</sub>O<sub>4</sub>)

Sadaf Bashir Khan<sup>1,2</sup>, Syed Irfan<sup>2,3</sup>, Shern Long Lee<sup>1,\*</sup>

<sup>1</sup> Institute for Advanced Study, Shenzhen University, Shenzhen, Guangdong 518060, China  
sadafbashirkhan@szu.edu.cn (S.B.K.)

<sup>2</sup> Key Laboratory of Optoelectronic Devices and Systems of Ministry of Education and Guangdong Province, College of Optoelectronic Engineering, Shenzhen University, Shenzhen 518060, Guangdong, China; syedirfan@szu.edu.cn (S.I.);

<sup>3</sup> Shenzhen Key Laboratory of Advanced Thin Films and Applications, College of Physics and Optoelectronics Engineering, Shenzhen University, Shenzhen 518060, China.

Correspondence: \* [sllee@szu.edu.cn](mailto:sllee@szu.edu.cn)

**Table S1** represents the average particle size variation of nickel zinc nano ferrites estimated via SEM

| Zinc Concentration | Particle size variation | Average Particle Size (D <sub>nm</sub> ) |
|--------------------|-------------------------|------------------------------------------|
| 0                  | 18-25                   | 21.5                                     |
| 0.25               | 23-36                   | 29                                       |
| 0.5                | 29-42                   | 36                                       |
| 0.75               | 47-60                   | 53.5                                     |
| 1                  | 63-79                   | 71                                       |
